# Supplementary material
Source: publisher figshare collection journal article supplement (https://acs.figshare.com/ndownloader/files/10240233)
Supplement: Supplementary file 1 [file 10240233]

## Sheet: Cmpd Characterization Checklist
																				jm-	2017-01834z
															Corresponding Author					Mengchao Cui, Zhigang Liang, Baian Chen
															Title	Oligoethyleneoxy-modified 99mTc-labeled beta amyloid imaging probes with improved brain pharmacokinetics for single-photon emission computed tomography
RECOMMENDED COMPOUND CHARACTERIZATION CHECKLIST NOTE: CHECKLIST IS RECOMMENDED BUT NOT REQUIRED
															asfsad
TO DISPLAY INSTRUCTIONS: Double-click HERE (Formula Bar must be visible: Select View>Formula Bar) TO CLOSE: Enter/Return 1. At the upper right, enter the name of the corresponding author and the title of the manuscript. For a new or updated Checklist included with a revision, enter the manuscript ID number next to "jm-". 2. In the left-most column, enter the identifying numbers (or table-entry nu…
COMPOUND				IDENTITY												PURITY					BIOMEDICAL TEST
Compound, structure, or table-entry number		New	Known	Melting point range	IR	UV-Vis	1H NMR	13C NMR	___ NMR	MS	HRMS	Optical rotation/ORD/CD	Enantiomeric/Diastereomeric ratio	X-ray [ORTEP and CIF in SI*]	Copy of 1H/13C NMR spectrum in SI*	<>	Elemental analysis	Quant. GC, HPLC, or electrophoresis	<> Other purity method	<>	In vitro	In vivo	<> Other test	* SI = Supporting Information
5		X					X
6			X
7		X					X
8			X
9		X					X
10			X
11		X					X
12		X					X
13		X					X			X								X
14		X					X			X								X
15		X		X			X	X			X							X
16		X		X			X	X			X							X
17			X
18			X
19		X					X
20		X					X
21		X					X
22		X					X
23		X					X			X								X
24		X					X			X								X
25		X		X			X	X			X							X
26		X		X			X	X			X							X
[99mTc]15		X																X			X	X
[99mTc]16		X																X			X	X
[99mTc]25		X																X			X	X
[99mTc]26		X																X			X	X
